# Supplementary material for: In-situ scalable manufacturing of Epstein–Barr virus-specific T-cells using bioreactor with an expandable culture area (BECA)
Source: PubMed Central journal article supplement (PMC9054749; doi:10.1038/s41598-022-11015-z), 2022-04-29
Supplement: 41598_2022_11015_MOESM1_ESM.pdf [file 41598_2022_11015_MOESM1_ESM.pdf]

In-situ scalable manufacturing of Epstein-Barr Virus-Specific T-cells using Bioreactor with an Expandable Culture Area (BECA)

Sixun Chen<sup>1</sup>, Ahmad Amirul Bin Abdul Rahim<sup>1</sup>, Who-Whong Wang<sup>2</sup>, Rachael Cheong<sup>2</sup>, Akshaya V Prabhu<sup>1</sup>, Jerome Zu Yao Tan<sup>1</sup>, May Win Naing<sup>3</sup>, Han Chong Toh<sup>2</sup>, Dan Liu<sup>1\*</sup>

<sup>1</sup>Bio manufacturing Technology, Bioprocessing Technology Institute, A\*STAR, 20 Biopolis Way, Singapore 138668, Singapore

<sup>2</sup>Division of Medical Oncology, National Cancer Centre Singapore, 11 Hospital Cres, Singapore 169610, Singapore

<sup>3</sup>Singapore Institute of Manufacturing Technology (SIMTech), A\*STAR, 2 Fusionopolis Way, Singapore 138634, Singapore

\*[liu\\_dan@bti.a-star.edu.sg](mailto:liu_dan@bti.a-star.edu.sg)

## Supplementary Figures

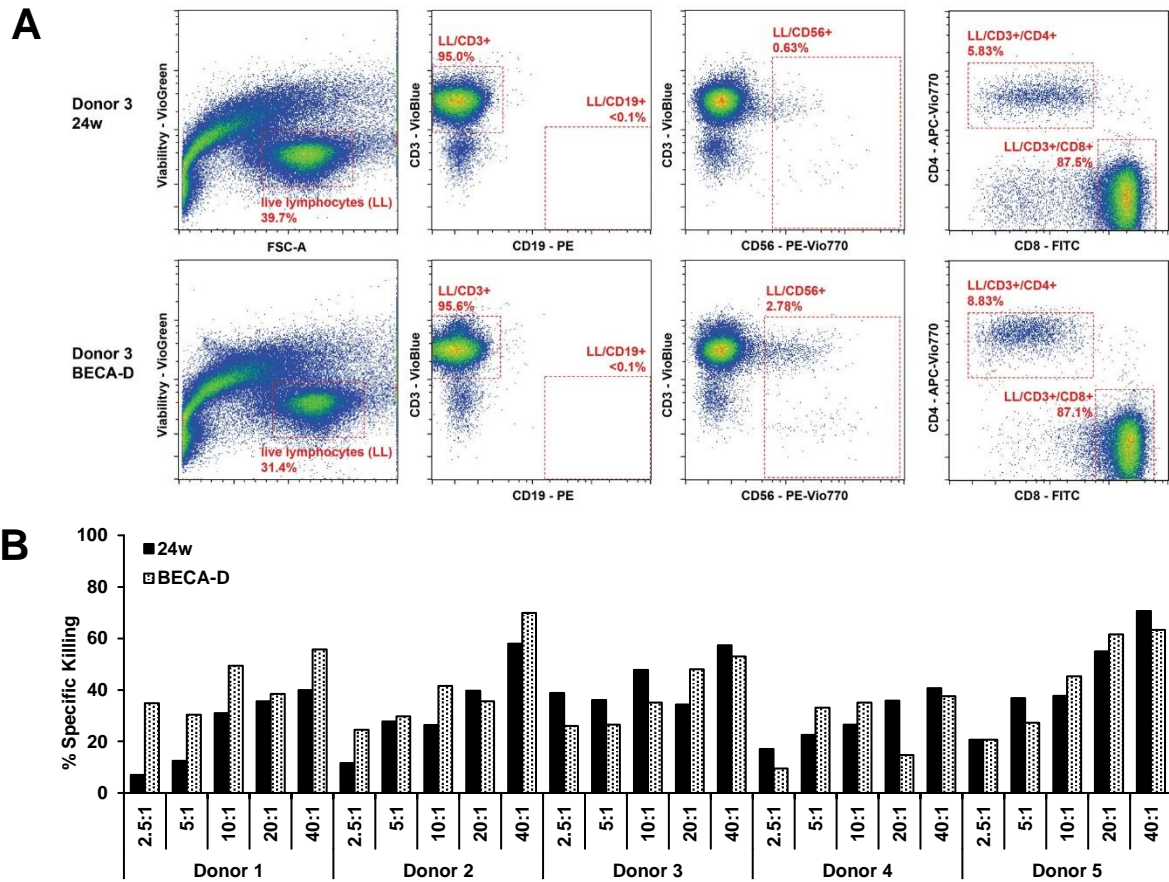

**Supplementary Figure 1.** (A) Representative flow cytometry plots showing gating strategy of CD3+ T-cells, CD19+ B-cells, CD56+ NK cells, CD4+ helper T-cells and CD8+ cytotoxic T-cells. (B) Performance of 24w and BECA-D culture across five donors in cytotoxicity assay with LCL:CTL ratios as indicated.

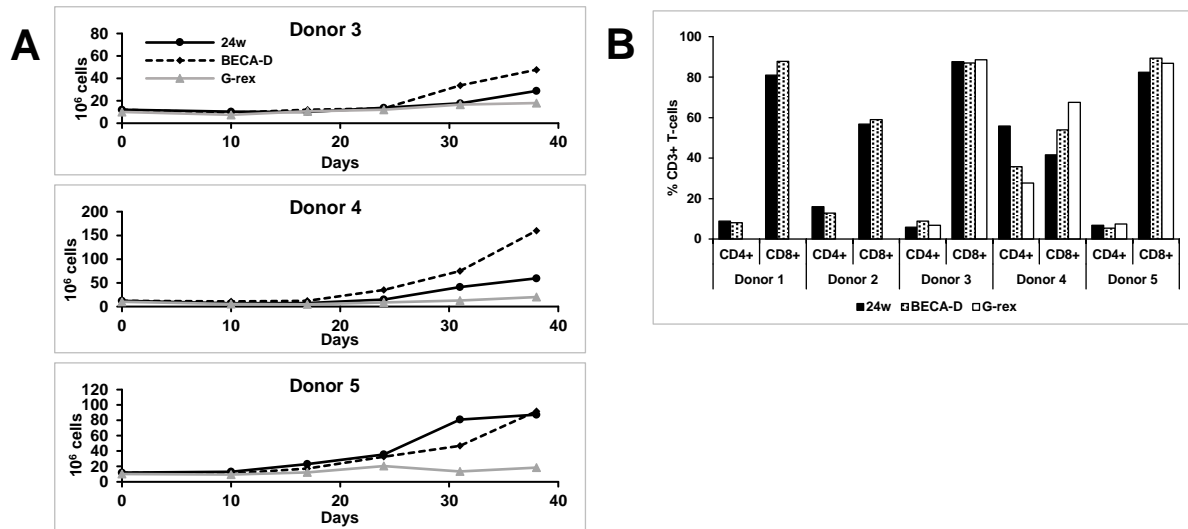

**Supplementary Figure 2. Expansion of EBVST in 24-well plate (24w), BECA-D and G-rbx.** (A) Plot of cell population numbers counted for 24-well plate (24w), BECA-D and G-rbx at the end of every activation for Donor 3, Donor 4 and Donor 5. (B) Percentage population of helper (CD4+) and cytotoxic (CD8+) T-cells under the subset of T-cells (CD3+) cells at the end of 5<sup>th</sup> activation for Donors 1-5. G-rbx culture was performed on Donor 3, 4 and 5.

|                                                           | <i>Vessel</i> | <i>Donor 1</i> | <i>Donor 2</i> | <i>Donor 3</i> | <i>Donor 4</i> | <i>Donor 5</i> |
|-----------------------------------------------------------|---------------|----------------|----------------|----------------|----------------|----------------|
| <b>Yield / Viability</b>                                  |               |                |                |                |                |                |
| Cell population<br>10 <sup>6</sup> cells<br>(% Viability) | 24w           | 10.3<br>(90%)  | 81.6<br>(78%)  | 28.8<br>(69%)  | 59.5<br>(85%)  | 87.4<br>(94%)  |
|                                                           | BECA-D        | 129.1<br>(95%) | 79.1<br>(91%)  | 47.7<br>(81%)  | 160.0<br>(90%) | 91.9<br>(91%)  |
|                                                           | G-rex         | -              | -              | 18.0<br>(69%)  | 20.0<br>(85%)  | 18.5<br>(94%)  |
| <b>Phenotype</b>                                          |               |                |                |                |                |                |
| % CD3                                                     | 24w           | 93.5           | 96.8           | 95.0           | 95.1           | 93.7           |
|                                                           | BECA-D        | 96.9           | 95.4           | 95.6           | 96.0           | 93.0           |
|                                                           | G-rex         | -              | -              | 90.7           | 94.8           | 91.2           |
| % CD19                                                    | 24w           | <0.1           | <0.1           | <0.1           | <0.1           | <0.1           |
|                                                           | BECA-D        | <0.1           | <0.1           | <0.1           | <0.1           | <0.1           |
|                                                           | G-rex         | -              | -              | <0.1           | <0.1           | <0.1           |
| % CD56                                                    | 24w           | 20.6           | 1.5            | 0.6            | 0.5            | 0.6            |
|                                                           | BECA-D        | 7.6            | 5.3            | 2.8            | 3.1            | 0.3            |
|                                                           | G-rex         | -              | -              | 0.7            | 1.0            | 0.4            |
| % CD3/CD4                                                 | 24w           | 8.8            | 15.9           | 5.8            | 55.8           | 6.8            |
|                                                           | BECA-D        | 8.1            | 12.8           | 8.8            | 35.7           | 5.4            |
|                                                           | G-rex         | -              | -              | 6.8            | 27.7           | 7.5            |
| % CD3/CD8                                                 | 24w           | 81.0           | 56.7           | 87.6           | 41.6           | 82.4           |
|                                                           | BECA-D        | 87.8           | 59.0           | 87.1           | 53.9           | 89.4           |
|                                                           | G-rex         | -              | -              | 88.6           | 67.5           | 86.9           |

**Supplementary Table 1: Results of EBV-CTL expansion process in 24-well**

**plate, BECA-D and G-rex.** Summary of results (yield, viability and phenotype) of the culture in 24-well plate, BECA-D and G-rex from five different donor runs.
